# Supplementary material for: Harmonization and Diagnostics of MIPAS ESA CH 4 and N 2 O Profiles Using Data Assimilation
Source: Copernicus journal article supplement (doi:10.5194/amt-2016-245), 2016-07-27
Supplement: Supplementary file [file amt-2016-245-AC2-supplement.pdf]

1 Responses to referee#2

2 We wish to thank the referee for his review. Our responses are given below where text in  
3 black corresponds to the referee comments, text in blue corresponds our responses and text  
4 in green corresponds to the text of the revised manuscript. All page and line numbers  
5 provide here refer to the manuscript available on the AMTD page, not to the upcoming  
6 version of the manuscript.

7 In addition to the change made in the manuscript to take into account your comments or the  
8 comments of the other referee, several other changes have been made and are listed here.

9 P4L90: “MIPAS” replaced by “MIPAS ESA”

10 P12L368-L373: “The discontinuities ..... .. may occur” replaced by

11 “These discontinuities are due to the combination of two effects. The first one is due  
12 to the decontamination procedure of the instrument (i.e. a warming-up of the  
13 instrument to remove the ice) which is operated once or twice per year. Sometimes  
14 after the decontamination an abrupt change, as high as 2%, is observed in the  
15 radiometric gain of band B where CH<sub>4</sub> and N<sub>2</sub>O are retrieved. The second effect is due  
16 to the calibration of the L1 data which is done once a week. Since the change in the  
17 gain occurs in the timeframe of 1-2 days, and since the calibration is not performed  
18 at the corresponding times, a discontinuity in CH<sub>4</sub> and N<sub>2</sub>O time series is introduced.  
19 This issue should be resolved in the future version 8 of MIPAS by doing daily  
20 calibration of L1 data.”

21 P12L382 and P13L418: “weekly calibration of L1 data” replaced by “abrupt change in the  
22 radiometric gain”

23

24 General Comments

25 In this paper, Errera et al. describe assimilation experiments using MIPAS upper-  
26 tropospheric/stratospheric CH<sub>4</sub> and N<sub>2</sub>O profiles from the ESA processing version 6 and,  
27 partly, also version 7. These tests indicate deficiencies in the retrieval results in the  
28 equatorial lower stratosphere/upper troposphere and problems due to the calibration  
29 during certain periods. The aim of the study is to demonstrate the possibilities of data  
30 assimilation for the diagnosis of space-borne atmospheric observations. To make this point  
31 clearer, it would be good if the authors could summarize, e.g. in the conclusions, which  
32 issues could only (or with more confidence) be detected due to the application of data  
33 assimilation and which would be obvious also without this technique. After addressing the  
34 items listed below, I support publication of the manuscript in AMT.

35 The conclusion has been updated in that sense and also to take into account a comment of  
36 referee#1. The 2<sup>nd</sup> § of the conclusions (P13L417-L422) has been rewritten as:

37 “Nevertheless, this study also diagnoses two issues in MIPAS CH<sub>4</sub> and N<sub>2</sub>O profiles.  
38 First, time series of MIPAS profiles show unexpected discontinuities which are due to  
39 the abrupt change in the radiometric gain of the instrument. A daily calibration might  
40 resolve this issue. While identified in this paper, this issue could have been found by  
41 data analysis methods other than data assimilation. Second, the correlations  
42 between BASCOE analyses and independent observations from MLS and ACE-FTS are

43 poor in the tropical lower stratosphere. This is due to outlier profiles which are not  
44 flagged out in the presence of clouds. This second issue was not identified in previous  
45 validation studies of MIPAS. One possible reason is that method to compare satellite  
46 observations usually depend on a coincidence criteria that limits the size of the  
47 sample. This is not the case any more if one compares data assimilated fields from  
48 one satellite instrument with observations from another satellite instrument as done  
49 in this paper. These two issues are also present in MIPAS version 7 and will be  
50 addressed in the future version 8.”

51 P13L432 sentence “Finally, this study ...” is removed.

## 52 Specific comments

53 P1L5: ‘can be noisy’. The term ‘noisy’ may imply that the effects are due to measurement  
54 noise; perhaps ‘unstable’ would be more suited(?)

55 Indeed, “noisy” might not be appropriate. We will replace it with “vertically oscillating”  
56 because it describes the shape of the profiles without indicating a cause for it.

57 P1L5: “noisy” replaced by “oscillating”.

58 P1L6: ‘B matrix’. This is ‘slang’ for insiders. Please use an explanatory term.

59 The term “B matrix” has been removed from the abstract but used in the body of the paper  
60 since well accepted by the data assimilation community (e.g. Bannister et al, 2008).

61 P1L11: ‘the calibration method’. Is it really the method or the availability of calibration  
62 data/files?

63 The discontinuities are due to an abrupt change in the gain and to the choice of performing  
64 the calibration weekly, even though daily calibration is possible. In V8 daily calibration data  
65 will be used and the impact of the abrupt change in the gain will be reduced. For V7, it is not  
66 a problem of availability of data/files, but a problem of performing the calibration once per  
67 week. The text has been modified to better explain this. P1L11 has been changed  
68 accordingly:

69 “First, time-series of the observations show unexpected discontinuities, due to an  
70 abrupt change in the gain of MIPAS band B, generally occurring after the instrument  
71 decontamination. Since the calibration is performed weekly, the abrupt change in the  
72 gain affects the measurements until the subsequent calibration is performed.”

73 P4L92: ‘(NOM) with altitude soundings between 7-72 km’. I think it is important to note here  
74 the latitude-dependence of the lowest tangent altitude in the OR phase.

75 In the revised paper we have pointed out that in the nominal mode of the OR phase the  
76 measurement grid depends on the latitude following a floating-altitude law. P4L93 added  
77 before “Most of the MIPAS profiles ...”:

78 “In OR measurements, NOM mode is characterized by a floating-altitude  
79 measurement grid. This means that the limb sounding grid is shifted rigidly with the  
80 lowest measured altitude which depends on the latitude. The floating-altitude  
81 sampling grid is meant to follow roughly the tropopause height along the orbit with  
82 the requirement to collect at least one spectrum within the troposphere while  
83 avoiding too many spectra affected by clouds.”  
84

85 P4L105-120: Please give the exact pages, where to find this in Rodgers, 2000. How has the  
86 interpolation of A and  $y_0$  been performed? Please give the formulas. Which vertical-grid has  
87 been used (altitude, pressure, theta)? Have dedicated AKs for each MIPAS profile been  
88 applied?

89 The equation is found more readily in Rodgers and Connor, 2003, JGR, now cited in place of  
90 Rodgers (2000).

91 The interpolation of A and  $y_0$  is linear along the logarithm of the pressure.  $\tilde{A}$  is normalized  
92 such that  $\sum(A_i) = \sum(\tilde{A}_i)$ , where  $i$  correspond to a row of A or  $\tilde{A}$ . Is there really a need  
93 to give a formula for that? MIPAS provides AK for each profiles which have been used as  
94 stated L105. P4L119 now has a new sentence:

95 "The interpolation is done along the logarithm of the pressure and  $\tilde{A}$  is normalised in  
96 order to have  $\sum_j A_{ij} = \sum_j \tilde{A}_{ij}$  where  $i$  and  $j$  denote, respectively, the rows and lines  
97 of A or  $\tilde{A}$ ."

98 P5L129: 'This is due to the use of an oscillating MIPAS profile'. Is it really only due to the  
99 oscillating MIPAS profile or also due to the AK? Could you please explain why it is 'allowed'  
100 to apply the Rodgers formulation using an already oscillating  $y_k$  – should the formulation not  
101 also be valid when a non-oscillating profile is used as  $y_k$  (I understood that this is not the  
102 case)? If it is only due to the profile and the oscillations are not in the AK, does this mean  
103 that the reason for the oscillations are due to some kind of systematic error (comparing the  
104 error bars in Fig. 1b with the strength of the oscillations it seems that those are not only due  
105 to random errors)? Is there any speculation on the reason for the oscillations? Will those be  
106 less strong in MIPAS version 8?

107 We can see in Fig. 1 that the AKs are positive peaked functions with different widths at  
108 different altitudes. Therefore, we do not see how the AKs could introduce oscillations in the  
109 result of Eq. (2). The Rodgers formulation should be valid in both cases of oscillating or non-  
110 oscillating profiles  $y_k$ . We agree with the reviewer that since the random errors are smaller  
111 than the oscillations, some systematic errors should induce these oscillations. At the  
112 moment we have not identified the cause of these oscillations but further investigations are  
113 ongoing.

114 P7L221: 'the variance of R is given by the ML2PP retrieval'. Does this account only for  
115 random noise or also for 'random'-like or systematic other error components, like calibration  
116 etc?

117 The R given by the ML2PP retrieval accounts only for random noise. We have specified this  
118 in the revised paper. P7L221 is replaced by:

119 "In this paper, the variance of R (which accounts only for the random noise errors) is  
120 given by the ML2PP retrieval ...."

121 P8L253: 'Figure 3 shows the zonal mean analysis of CH<sub>4</sub> from six BASCOE experiments'. It  
122 would be interesting to plot here also zonal means of the 'pure' MIPAS dataset. Further, has  
123 the latitude dependent lower boundary of MIPAS been considered? I.e. are you sure that no  
124 data are plotted which are below the lowest tangent altitude of the limb-sounder or is this  
125 covered by use of location-specific AK's?

126 Zonal mean of MIPAS CH<sub>4</sub> will be added in Figure 3 (see below) with white spots to indicate  
127 missing values. MIPAS zonal mean are from MIPAS data that are binned on a 5 degree

128 latitude grid and the a pressure grid with 6 pressure levels per decade of pressure. The  
 129 latitude dependence of MIPAS w.r.t. the lower boundary is considered since the altitude of  
 130 MIPAS tangent point is identified by the pressure profile, which is itself measured by MIPAS.  
 131 Here is the new Fig. 3 with the updated legend:

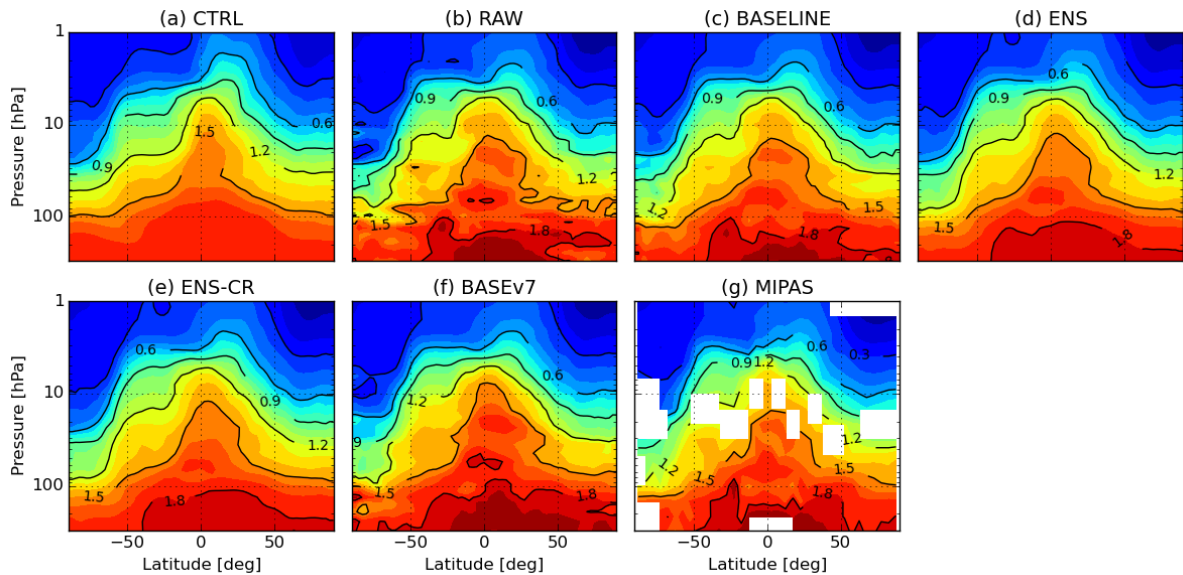

132  
 133 Figure 3: Zonal mean of CH<sub>4</sub> (ppmv) from six BASCOE experiments and from MIPAS  
 134 on September 15, 2008 at 12 UT (see text for details). Here MIPAS data are binned on  
 135 a 5 degree latitude grid and a pressure grid with 6 pressure levels per decade of  
 136 pressure.

137 P8L253, added after “is representative of other dates.”:

138 “The MIPAS CH<sub>4</sub> zonal mean is also shown in the figure in order to allow comparison  
 139 with the assimilated dataset.”

140 P9L293: ‘This suggests that the observational error covariance matrices provided by the  
 141 MIPAS ML2PP retrieval are not optimal for data assimilation.’ Could you show such a  
 142 covariance matrix? Are there any ideas if there are general problems with the error  
 143 covariances of MIPAS?

144 See answer to referee 1 regarding this issue.

145 P12L384: ‘in the tropics. In that region, REAN analyses are relatively noisy and the N<sub>2</sub>O  
 146 seasonal variations observed by MLS are not reproduced by the reanalysis of MIPAS N<sub>2</sub>O  
 147 and CH<sub>4</sub>.’ Do you mean at the lowest level? Any idea why this is not observed by MIPAS? Is it  
 148 present in the MIPAS raw data? Could it be due to cloud contamination? Is this feature  
 149 present in the raw simulations?

150 We are referring to the lowest level. Seasonal variations observed by MLS are hardly seen in  
 151 the MIPAS raw data more likely due to cloud contamination in the tropics (as mentioned in  
 152 the § starting at P12L386). It is not clear if this feature is present in the RAW simulation since  
 153 it only covers the period April-November 2008. The following sentence will be added at  
 154 P12L385:

155 “Note that seasonal variations observed by MLS are hardly seen in the MIPAS raw  
 156 data.”

157 P13L415: ‘are in good agreement’. This expression is also used elsewhere in the paper. It  
158 would be better to make ‘good’ more quantitative by e.g. providing a specific context (‘good’  
159 compared to what?).

160 The sentence is changed by: “... measured by MLS and ACE-FTS, usually within  $\pm 10\%$ ”.

161 P13L418: ‘show unexpected discontinuities which are to be due to the weekly calibration of  
162 L1 data’. It would be very helpful for users of MIPAS data to provide a table with the exact  
163 dates affected by the calibration issues.

164 This table is already reported in Table 5 in De Laurentis and Raspollini (2016) available here:  
165 [https://earth.esa.int/documents/700255/2635669/RMF\\_0141+MIP\\_NL\\_2P\\_issue1.pdf/59beb833-5ad4-4301-8422-f41001da36d4](https://earth.esa.int/documents/700255/2635669/RMF_0141+MIP_NL_2P_issue1.pdf/59beb833-5ad4-4301-8422-f41001da36d4) . A reference to this document is provided in the  
166 revised version of the paper.  
167

168 The following sentence is added at the end of P12L384:

169 “Days for which L1 data are not properly calibrated are reported in De Laurentis and  
170 Raspollini (2016, see Table 5).”

171 P21Fig5: It would be illustrative to show the ACE-FTS regression curve from (a) in all subplots  
172 (b-f).

173 Done, see the updated figure and its caption.

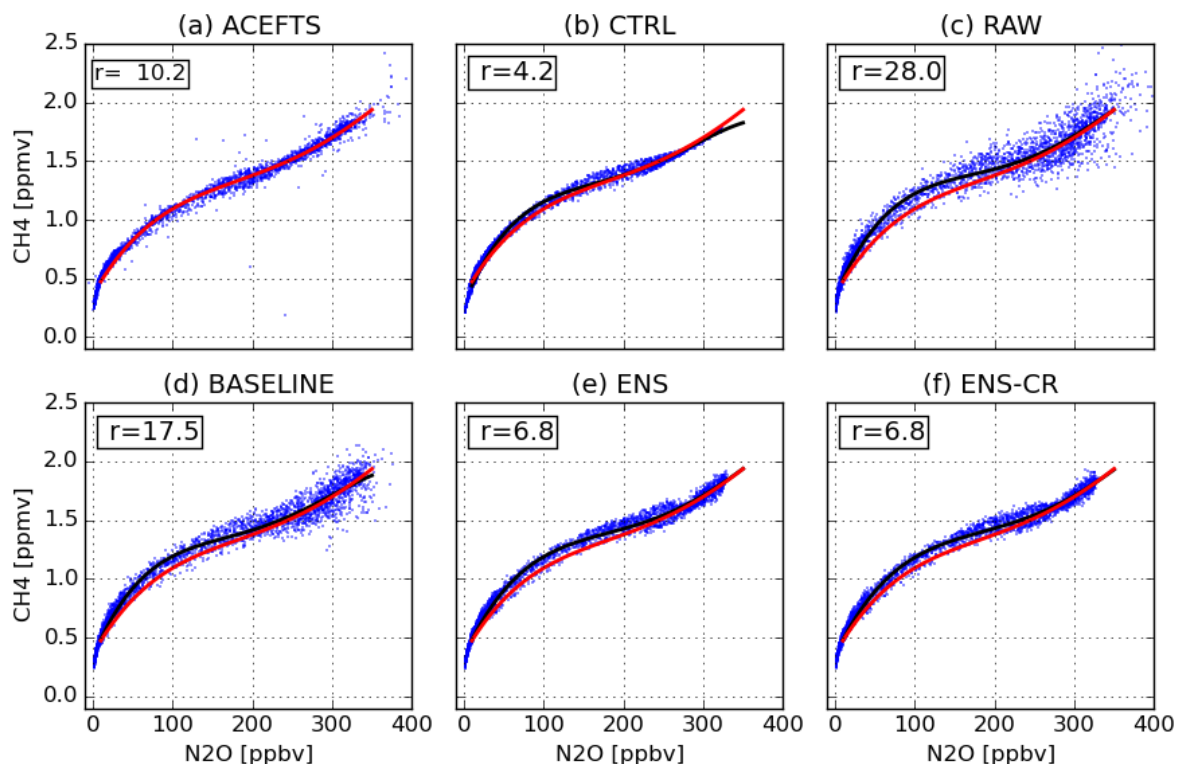

174  
175 Figure 5. N<sub>2</sub>O-CH<sub>4</sub> scatter-plot between 30°S-30°N as observed by ACE-FTS (a) and  
176 for five BASCOE experiments interpolated to the ACE-FTS observation space (b-f). The  
177 correlations are shown for the period April-October 2008. The result of a four-degree  
178 polynomial fit is also shown (red line for ACE-FTS, black lines for BASCOE  
179 experiments) with the root mean square of the residual between the fitted curve and  
180 the observations printed in the upper left of each plot. The correlation curve of ACE-

181 FTS (red curve) is reported in the correlation plots of the BASCOE experiments (b-f).

182 Technical corrections

183 P6L171: 'recommandation' -> 'recommendation'

184 Corrected

185 P10L326: ' (Fig. 5)': but BASEv7 is not shown there(?)

186 P10L326 "correlation is better with BASEv7 (Fig. 5)" replaced by "correlation is better with  
187 BASEv7"

188 P11L338: 2x 'agreement': please improve text

189 Corrected

190 P21, Figure 5a: please use the same grid lines as in other sub-plots P21, Figure 5 caption:  
191 'experiments' -> 'experiments'

192 Corrected, see above.
